# Supplementary material
Source: publisher figshare collection journal article supplement (https://future-science-group.figshare.com/ndownloader/files/31558853)
Supplement: Supplementary file 1 [file 31558853]

**Appendix-** 1

**Interview Guide for Program Participants**

**Chronic Pain**

1. Can you tell us about your experience with chronic pain?

*If needed probe with:* describe your level of functionality, quality of life other challenges

1. What was your experience like with the treatment received before the Chronic Pain Clinic (CPC)?

*If needed probe with*: Are you using opioids and for how long, it is helpful?

**Program Expectations and outcomes:**

1. Going into the CPC program, what did you expect you would get out of it?
2. What was your experience like at the CPC program?
3. Do you feel that:
   1. you know more about pain management and opioid use because you are participating in the treatment program?
   2. your beliefs about pain management have changed since beginning the CPC program?
   3. the information you got from the program helped you better manage your pain and reduce opioid use? Can you give me an example
   4. you tried to work on your pain and opioid use issues more after attending the program? Can you give examples
   5. your quality of life/ lifestyle changed after participating in this program?
   6. Is the information you learned in the program useful in real-life situations? Can you give an example?

**Communication with staff members delivering the program:** -

1. Were the healthcare providers, such as the physicians and staff members, supportive and understanding? *Probe with if necessary Healthcare providers:*
   1. respect your needs?
   2. answer your questions?
   3. are available and approachable when you need help?
   4. treated you unfairly?

**Environmental factors:**

1. During this program, have you experienced a relapse?
   1. If not, can you think of things that can lead to relapse?
   2. If yes, can you tell us how it happened?
   3. Do you have family/ friends who can help you manage your opioid use?
   4. Do you have caseworkers/addiction counselors/addiction support workers in the community who can help you if you need help?
2. Do you have any suggestions on how services delivered through CPC can be improved?
   1. Did you want to say anything else about the CPC program that we have not covered?

**Part II: In this part, we will talk specifically about the traditional healing services received by patients if applicable.**

1. Did you know anything about the traditional services offered before you met with the Doctor (Pain specialist)?
2. Have you participated in any other holistic healing practices before? If yes, please describe your experiences?
3. Can you please tell us about your experience receiving the traditional services offered at the center offering Traditional healing services?
4. Please provide examples if any of how these traditional healing services helped you better manage your pain/overall health /addiction? Probe if necessary
   1. information received through the program is useful in a real-life situation? Can you give an example?
   2. Did you experience any change in the quality of life/lifestyle changes after receiving traditional healing services?
5. Do you have any suggestions about how to improve the CPC program?
